# Supplementary material for: Spermidine carbon dots enhance thermotolerance by modulating photosynthesis and cellular redox homeostasis in tomato
Source: Royal Society of Chemistry journal article supplement (doi:10.1039/d2en00597b), 2022-12-23
Supplement: d2en00597b1.pdf [file d2en00597b1.pdf]

## Supplemental Table S1 Primers used for genes expression analysis

| Accession number | Genes        | Forward primers (5'-3') | Reverse primers (5'-3') |
|------------------|--------------|-------------------------|-------------------------|
| Solyc00g500209   | <i>PsaA</i>  | TTGTTTGGGCTACTGGATTTA   | CAAATTGGCCAAAGGTGTG     |
| Solyc00g500057   | <i>PsaB</i>  | GCACATTTTCGGTCAACTCT    | CACTTAGCCACGCTTCATAA    |
| Solyc06g054260   | <i>PsaD</i>  | ATTGGACCCAAACACACCCT    | GCACTGTTCTTTCCTTGCCA    |
| Solyc06g083680   | <i>PsaE</i>  | AATGTTGCCTCCAACACCAC    | GTGGCTTAGCAGCTTTGGTT    |
| Solyc02g069450   | <i>PasF</i>  | TCTTCCAGCTTCTGCTGACA    | GGGCGCTATCAGGTGAGTAA    |
| Solyc06g066640   | <i>PsaH</i>  | AGTAGTGTCAAGGGCCTAGC    | GCTTCACATTGAGGCGAGAT    |
| Solyc09g064400   | <i>PsaJ</i>  | ATGCGAGATCTAAA          | GAATGAAAAAAGGGG         |
| Solyc08g006930   | <i>PsaK</i>  | TGGCTTCCACCATGATGACT    | TCCCAAACCACCTTGTCTT     |
| Solyc06g082940   | <i>PsaL</i>  | CGGCCTTGTTACTCCCAAAG    | TCAATGGGCTTGAGGTGACT    |
| Solyc08g013670   | <i>PsaN</i>  | CGCAAGGGCGTATACTGTTC    | CTTCACACTCCAACGCCAAA    |
| Solyc00g500329   | <i>PsbA</i>  | GGCGTAGCTTGTTACATGGG    | TGCAACAGCAATCCAAGGTC    |
| Solyc00g500071   | <i>PsbB</i>  | TGGGCCCACTCGTTATCAAT    | TTGCCGGATTATTGCCGATG    |
| Solyc00g500206   | <i>PsbC</i>  | TCATGTAGCCCATGCTGGAT    | ACATAGGCTTCTCGGGTACG    |
| Solyc09g063130   | <i>PsbE</i>  | GAACACCACCACCAACATCC    | CCAATTGGAGGTGGCTTGAC    |
| Solyc00g500136   | <i>PsbQ</i>  | TCATGTAGCCCATGCTGGAT    | ACATAGGCTTCTCGGGTACG    |
| Solyc06g074200   | <i>PsbO</i>  | ACTGGACCTGCTCTCACTTC    | AGTCAGGCAGAGGAACAACC    |
| Solyc12g094720   | <i>PsbP</i>  | TCCGCCTTTACATCGATTGC    | GCGCCTATTTGCCAATCACT    |
| Solyc09g076030   | <i>Psb27</i> | GTGGTGAAGACATTGCGTGA    | GTCCTCTCCATCCACCCAAG    |
| Solyc09g064490   | <i>Psb28</i> | CTCACTTGGTGGCTTCCCTA    | TAGTGGCAATCCAAGGAGCA    |
| Solyc05g056050   | <i>Lhca1</i> | CAGATGGGCTATGCTTGCTG    | GGCTGGCCCAAATATGTAGC    |
| Solyc10g006230   | <i>Lhca2</i> | ACGGACACAACGACTCTCTT    | CCGTGAGCTTGTTGTTAGGG    |
| Solyc10g007690   | <i>Lhca3</i> | CACTCCACCAGTCAAGCAAG    | CTAGCCATTTTCGGCTCGATG   |
| Solyc12g011280   | <i>Lhca4</i> | GGCAACACAGGCATTGATCT    | TGGCAGTAGCCCTTACAACA    |

---

|                |               |                       |                       |
|----------------|---------------|-----------------------|-----------------------|
| Solyc07g022900 | <i>Lhca5</i>  | GCCAGTGTGGTATGAAGCAG  | TGCTTGAGAGCCAGGATGAA  |
| Solyc12g009200 | <i>Lhcb1</i>  | TGGGACTAGGGTCTGATCCA  | ACTCTCGTTCACCAGCATCA  |
| Solyc07g047850 | <i>Lhcb2</i>  | ACGGACACAACGACTCTCTT  | CCGTGAGCTTGTTGTTAGGG  |
| Solyc01g105050 | <i>Lhcb3</i>  | CTCACTTCTTGGCACTCAGC  | TTGTCSGAAGAAGTCGACCCA |
| Solyc09g014520 | <i>Lhcb4</i>  | AAAGGCTGCGAAGAAGCAAA  | ATACTCCGGTGCCTTAGCTC  |
| Solyc06g063370 | <i>Lhcb5</i>  | ATTTGGTGCCAACTGTGGTC  | CAGCACCACCAACAAGAACA  |
| Solyc01g105030 | <i>Lhcb6</i>  | CATCTGCTGCAGTGCTGAAT  | CACCACCTCTTACAGCAGGA  |
| Solyc00g500067 | <i>PetA</i>   | AGGGACGTCAAGTGGTTGAT  | TCTGCATCTCCCTGACCAAA  |
| Solyc00g500027 | <i>PetB</i>   | TCGATGGTCGGCAAGTATGA  | AGCCAGAACCACACCTGTAA  |
| Solyc12g005630 | <i>PetC</i>   | TTGGGTGCACTTGCTTTACC  | GGTACCACCACTACCACCTC  |
| Solyc00g500158 | <i>PetD</i>   | AAATCCATTTTCGCCGTCCAG | AATGTTGCACCAATGCCCAA  |
| Solyc01g110360 | <i>FBA1</i>   | GCCATGAACCAAGCTCCAAA  | GCAGCCTTCACATTCTCAGG  |
| Solyc02g062340 | <i>FBA2</i>   | CCATGGCACGTATCGTTCTC  | CCGGTGTATTTGCCTAGTTGC |
| Solyc02g084440 | <i>FBA3</i>   | TGTCGTTCTCATAACGCCAGA | ATCCTGAGCTGCCTTCACAT  |
| Solyc07g065900 | <i>FBA6</i>   | GCACTCAATGACCAGCATGT  | TCCTCACTCTGTCTCCTGA   |
| Solyc09g009260 | <i>FBA7</i>   | TGAGACCACCACTCAAGGTC  | CCATTTGGCGAACCTAGCAC  |
| Solyc07g066610 | <i>PGK1</i>   | TCGCTGATCCTCTCTTACC   | TCAGCCCTGACGAAGACTTT  |
| Solyc07g066600 | <i>PGK2</i>   | AGCCACTTGTGCCTAGACTT  | TCCAGCCACCAAGTTCTCAA  |
| Solyc09g008130 | <i>PGK3</i>   | GGGAGCAGAAGAAACAGCAG  | AATTTGAGAAGCCGCGAGTC  |
| Solyc05g052600 | <i>SBPase</i> | TCTCCAACAGCTAAGGCGAA  | GGACGGATTGTTTCCCATCG  |
| Solyc09g011080 | <i>RCA1</i>   | GTCGATAGCTTCCCTGGACA  | GCCGTAICTCGAGGAGCTTAT |
| Solyc10g086580 | <i>RCA2</i>   | TGCCTCAGTGTCAACCATTG  | ACGGAAGTTCCAGCAACTGA  |
| Solyc03g117850 | <i>RCA3</i>   | CTAGGGCTGGCGTCATTGAT  | CCTAGTCACCTTCTGCCGAT  |
| Solyc12g056530 | <i>FBP1</i>   | GGGCACTGGACTTAGTTCCT  | TCTCTTCAGCAGCATAAAGCC |
| Solyc04g071340 | <i>FBP2</i>   | TACTGCGTGCCCAATCTCTT  | AAGTCTCCACGGGATTCAGG  |
| Solyc09g011810 | <i>FBP2</i>   | CCAGGGACAAACCTTCTTGC  | TCCAGAGCTGGTAGTTTCC   |

---

---

|                |                     |                          |                          |
|----------------|---------------------|--------------------------|--------------------------|
| Solyc01g099620 | <b><i>RbohA</i></b> | GAGAGTAGGATTCAGCGGT      | GCCTCTTTTCGAGCTTGCT      |
| Solyc03g117980 | <b><i>RbohB</i></b> | AGGGAATGATAGAGCGTCG      | CATCGTCATTGGACTTGGC      |
| Solyc05g025690 | <b><i>RbohC</i></b> | ATGGAAAGCGGTGAGGAATAAA   | AGCATTGAACCGACTCTCAAC    |
| Solyc06g068680 | <b><i>RbohD</i></b> | CCTCCTACACCACCAAATC      | GCCCAGTGCTTCAATCTCT      |
| Solyc05g054760 | <b><i>DHAR</i></b>  | CCCTGATGTCCTTGGAGACT     | AAGAACCATTTGGGCTTGTC     |
| Solyc08g081530 | <b><i>MDHAR</i></b> | TCCGAACAAACATACCTGGA     | CGTGTGTGCAGTTAGCAATG     |
| Solyc06g005160 | <b><i>APX</i></b>   | GACTCTTGGAGCCCATTAGG     | AGGGTGAAAGGGAACATCAG     |
| Solyc12g094620 | <b><i>CAT</i></b>   | TGATCGCGAGAAGATACCTG     | CTTCCACGTTTCATGGACAAC    |
| Solyc11g066390 | <b><i>SOD</i></b>   | CTCCTGGAGATGAAATCCGT     | AAGTGCTCGTCCAACAACCTG    |
| Solyc08g006720 | <b><i>GPX</i></b>   | GACAAGGTCGACGTGAATGG     | CGTCGTTGGTGGATACCTCT     |
| Solyc09g091840 | <b><i>GR</i></b>    | TCTGATGCTGCCCTTGA        | GCGACTCCTCGGTATGG        |
| Solyc11g005330 | <b><i>actin</i></b> | TGTCCCTATTTACGAGGGTTATGC | CAGTTAAATCACGACCAGCAAGAT |

---
