# Supplementary material for: Spermidine carbon dots enhance thermotolerance by modulating photosynthesis and cellular redox homeostasis in tomato
Source: Royal Society of Chemistry journal article supplement (doi:10.1039/d2en00597b), 2022-12-23
Supplement: d2en00597b2.pdf [file d2en00597b2.pdf]

**Spermidine carbon dots enhances thermotolerance by  
modulating photosynthesis and cellular redox  
homeostasis in tomato**

**Supplementary data**

**A**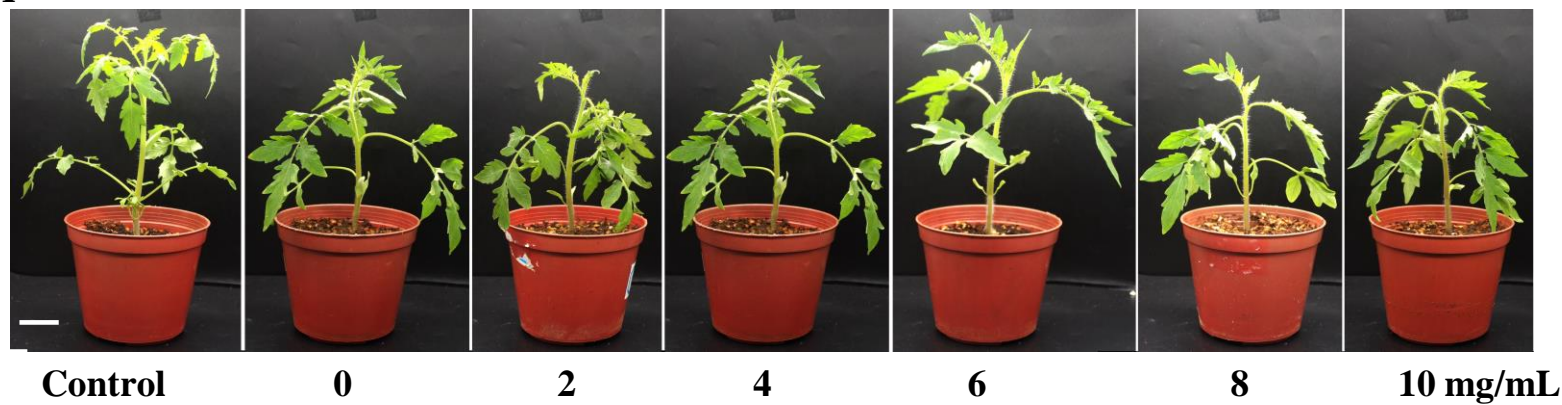**B**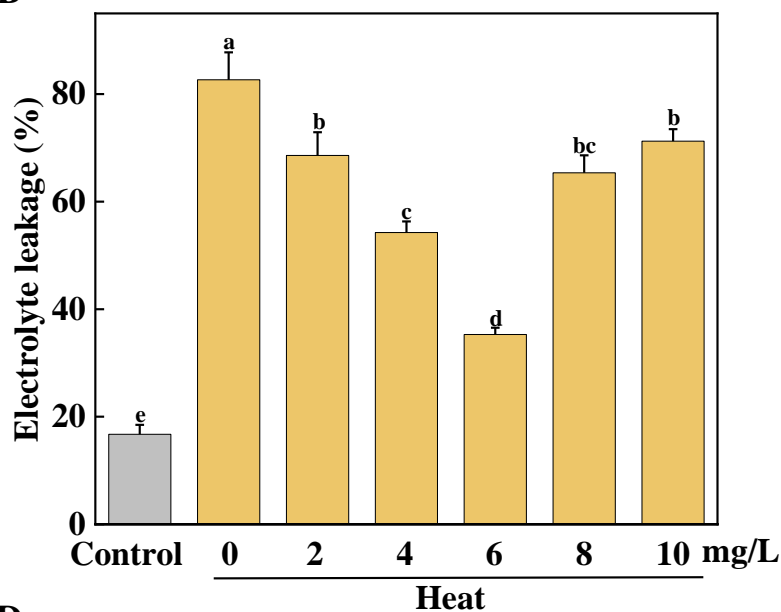**C**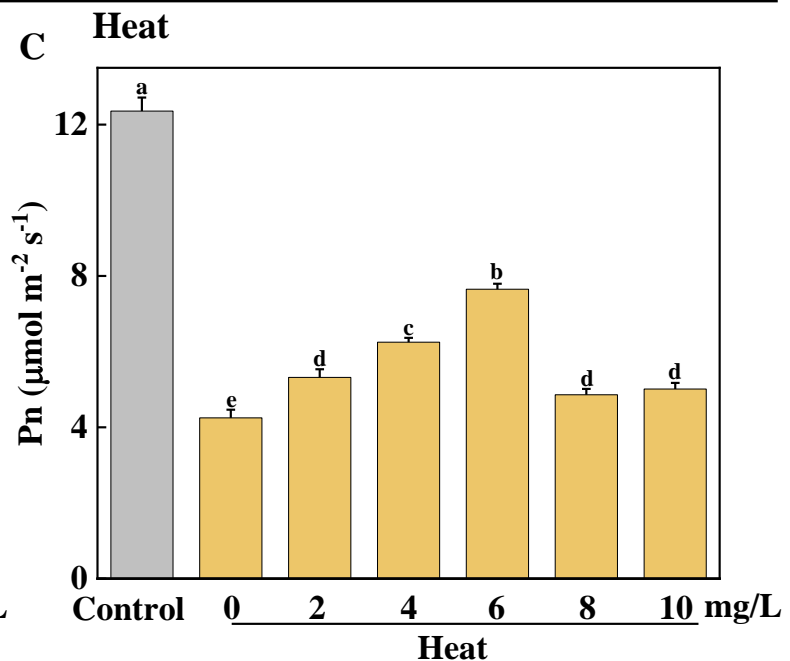**D**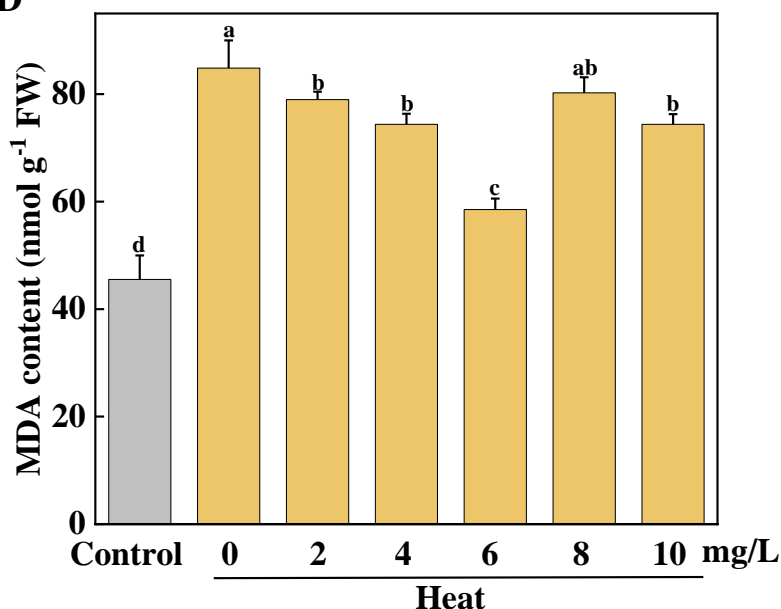**E**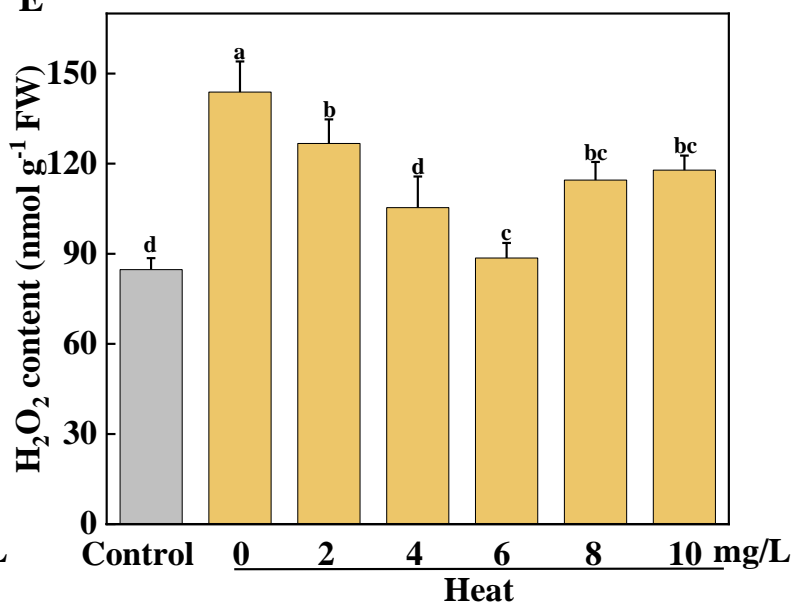

**Figure S1.** Phenotypic and physiological analysis of different Spd-CDs concentrations on the enhancement of thermotolerance in tomato plants. The phenotypes of 0, 2, 4, 6, 8, 10 mg/L Spd-CDs pretreated plants under normal temperature (25 °C, Control) or high temperature (45 °C, Heat) treatment, and the plant images was taken in 24 h later, bar=10 cm (A). The relative electrolyte leakage (B), the net photosynthesis rate (Pn) (C), MDA (D) and H<sub>2</sub>O<sub>2</sub> (E) content of tomato leaves after 12 h of different temperature treatments. The Pn values were measured under photosynthetically active radiation (PAR) at 800 μmol m<sup>-2</sup> s<sup>-1</sup>. Images shown in A was digitally extracted and scaled for comparison. The data in B to C are presented as mean values±SD; n=3. Different letters indicate significant differences between treatments (*P*<0.05, Duncan's multiple range test). Three independent experiments were performed with similar results.

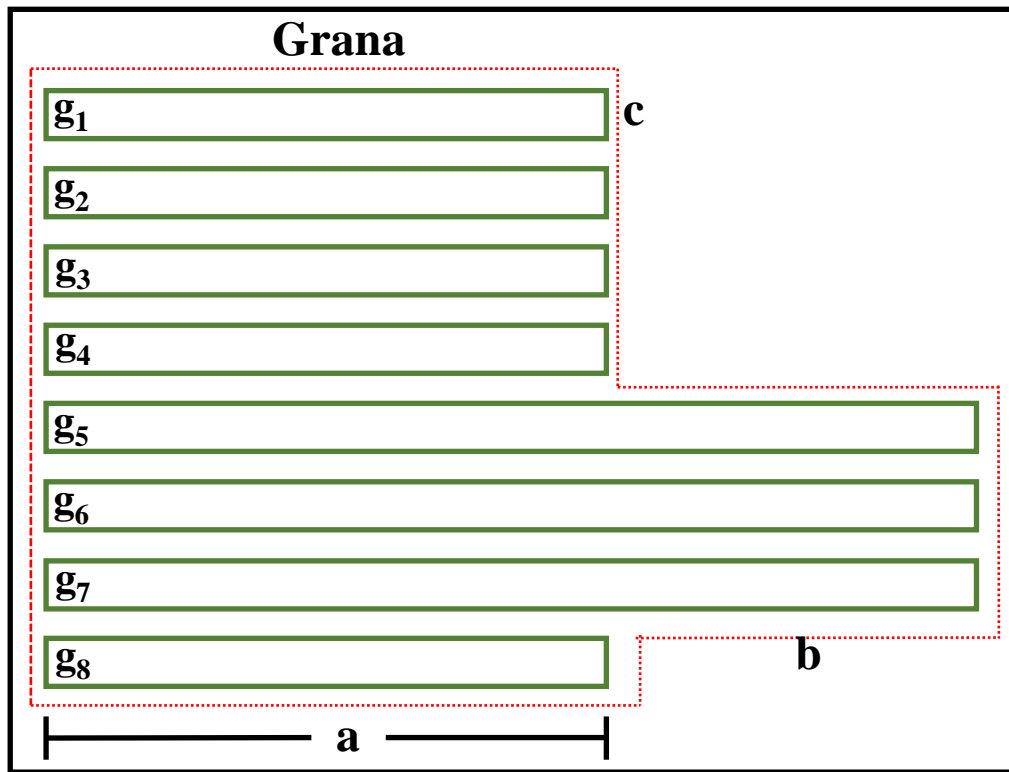

**Figure S2.** The schematic illustration of chloroplast membrane ultrastructure. The analysis of morphometric was performed based upon the following rules: **a**, grana width; **b**, grana surface area; **c**, single granum thylakoid height; the sum of  $g_1$  to  $g_8$  is granum height (GH).

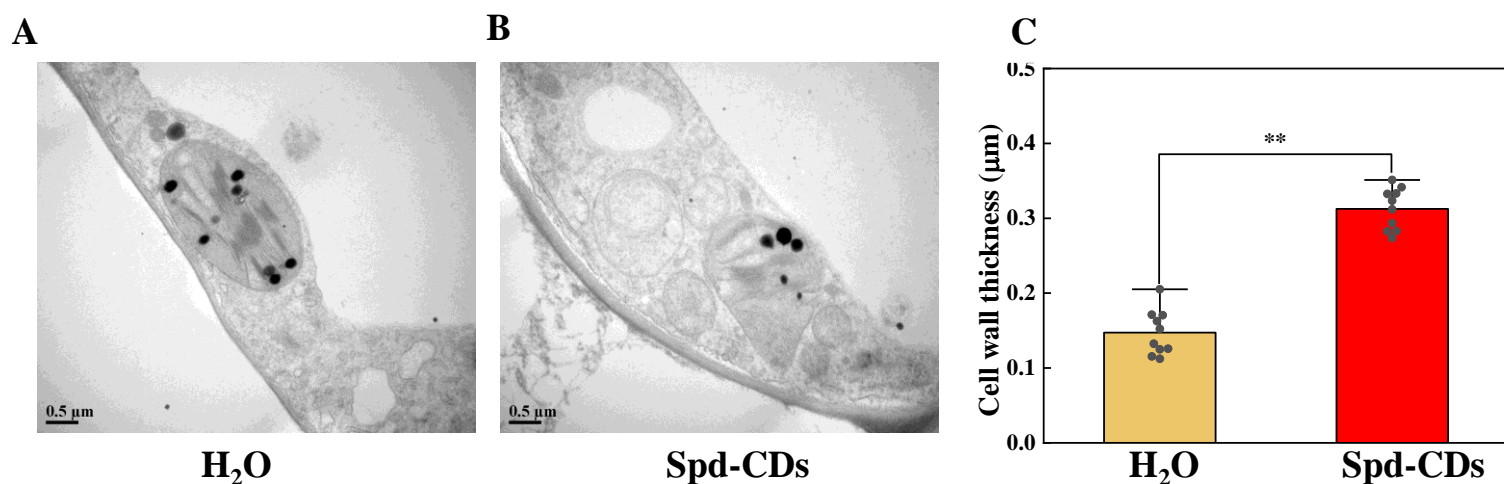

**Figure S3.** TEM images showing Spd-CDs increased cell wall thickness in the primary leaves of tomatoes. The effects of Spd-CDs on the ultrastructure of cell wall thickness under normal conditions (**A**, **B**). The cell wall thickness (**C**). The data are presented as mean values  $\pm$  SD;  $n=10$ . Asterisks indicate significant differences between treatments (\*\* $P < 0.01$ , Duncan's multiple range test). Three independent experiments were performed with similar results.

**A**

|             |                       |                |                       |                |
|-------------|-----------------------|----------------|-----------------------|----------------|
| <i>PsaA</i> | 1.01                  | 1.15           | 0.45                  | 0.85           |
| <i>PsaB</i> | 1.00                  | 2.10           | 0.44                  | 0.75           |
| <i>PsaD</i> | 1.00                  | 1.35           | 0.31                  | 0.95           |
| <i>PsaE</i> | 0.96                  | 2.45           | 0.39                  | 0.84           |
| <i>PasF</i> | 0.94                  | 2.10           | 0.62                  | 0.67           |
| <i>PsaH</i> | 1.01                  | 1.45           | 0.32                  | 0.77           |
| <i>PsaJ</i> | 1.12                  | 1.32           | 0.85                  | 1.33           |
| <i>PsaK</i> | 1.09                  | 2.22           | 0.67                  | 0.71           |
| <i>PsaL</i> | 1.08                  | 1.19           | 0.27                  | 0.69           |
| <i>PsaN</i> | 1.02                  | 2.35           | 0.35                  | 0.88           |
|             | <u>H<sub>2</sub>O</u> | <u>Spd-CDs</u> | <u>H<sub>2</sub>O</u> | <u>Spd-CDs</u> |
|             | Control               |                | Heat                  |                |

**B**

|              |                       |                |                       |                |
|--------------|-----------------------|----------------|-----------------------|----------------|
| <i>PsbA</i>  | 1.02                  | 3.25           | 0.36                  | 3.12           |
| <i>PsbB</i>  | 1.01                  | 2.98           | 0.45                  | 2.85           |
| <i>PsbC</i>  | 0.99                  | 3.50           | 0.55                  | 3.40           |
| <i>PsbE</i>  | 1.12                  | 3.15           | 0.32                  | 3.00           |
| <i>PsbQ</i>  | 1.13                  | 3.60           | 0.28                  | 3.42           |
| <i>PsbO</i>  | 0.97                  | 4.20           | 0.38                  | 3.85           |
| <i>PsbP</i>  | 1.14                  | 3.98           | 0.40                  | 3.72           |
| <i>Psb27</i> | 1.10                  | 2.36           | 0.51                  | 2.26           |
| <i>Psb28</i> | 0.99                  | 3.85           | 0.36                  | 3.75           |
|              | <u>H<sub>2</sub>O</u> | <u>Spd-CDs</u> | <u>H<sub>2</sub>O</u> | <u>Spd-CDs</u> |
|              | Control               |                | Heat                  |                |

**C**

|              |                       |                |                       |                |
|--------------|-----------------------|----------------|-----------------------|----------------|
| <i>Lhca1</i> | 0.99                  | 1.35           | 0.62                  | 0.80           |
| <i>Lhca2</i> | 1.03                  | 1.25           | 0.53                  | 0.76           |
| <i>Lhca3</i> | 1.11                  | 1.22           | 0.43                  | 0.69           |
| <i>Lhca4</i> | 1.13                  | 1.34           | 0.34                  | 0.65           |
| <i>Lhca5</i> | 0.97                  | 1.34           | 0.36                  | 0.69           |
|              | <u>H<sub>2</sub>O</u> | <u>Spd-CDs</u> | <u>H<sub>2</sub>O</u> | <u>Spd-CDs</u> |
|              | Control               |                | Heat                  |                |

**D**

|              |                       |                |                       |                |
|--------------|-----------------------|----------------|-----------------------|----------------|
| <i>Lhcb1</i> | 0.98                  | 1.20           | 0.65                  | 1.15           |
| <i>Lhcb2</i> | 1.02                  | 1.65           | 0.42                  | 1.45           |
| <i>Lhcb3</i> | 1.06                  | 1.54           | 0.53                  | 1.44           |
| <i>Lhcb4</i> | 0.97                  | 1.72           | 0.48                  | 1.53           |
| <i>Lhcb5</i> | 1.04                  | 2.10           | 0.45                  | 1.86           |
| <i>Lhcb6</i> | 1.10                  | 1.98           | 0.51                  | 1.67           |
|              | <u>H<sub>2</sub>O</u> | <u>Spd-CDs</u> | <u>H<sub>2</sub>O</u> | <u>Spd-CDs</u> |
|              | Control               |                | Heat                  |                |

**E**

|             |                       |                |                       |                |
|-------------|-----------------------|----------------|-----------------------|----------------|
| <i>PetA</i> | 1.03                  | 1.35           | 0.36                  | 0.74           |
| <i>PetB</i> | 0.97                  | 1.44           | 0.39                  | 0.85           |
| <i>PetC</i> | 1.01                  | 1.32           | 0.42                  | 0.82           |
| <i>PetD</i> | 0.99                  | 1.25           | 0.46                  | 0.79           |
|             | <u>H<sub>2</sub>O</u> | <u>Spd-CDs</u> | <u>H<sub>2</sub>O</u> | <u>Spd-CDs</u> |
|             | Control               |                | Heat                  |                |

**Figure S4.** Transcription of photosystem I (PSI) (**A**) and PSII (**B**), light-harvesting complex (LHCI and LHCII) (**C** and **D**) and photosynthetic electron transport (PET) (**E**) in Spd-CDs pretreated plants under normal temperature (25 °C) or high temperature (45 °C) treatment. 6 h after the application, leaf samples were collected for gene expression analysis. *Actin* was used as the reference gene. The data are presented as mean values±SD; n=3. Three independent experiments were performed with similar results.

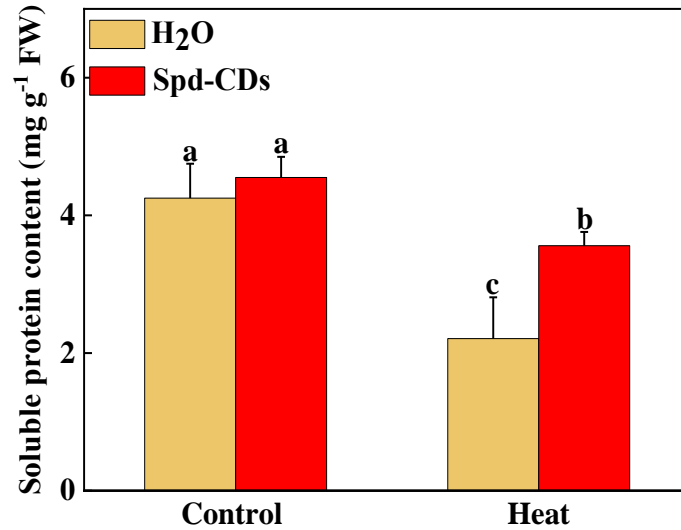

**Figure S5.** The protein content of leaves in Spd-CDs pretreated plants under normal temperature (25 °C) or high temperature (45 °C) treatment. The data are presented as mean values $\pm$ SD; n=3. Different letters indicate significant differences between treatments ( $P<0.05$ , Tukey's test). Three independent experiments were performed with similar results.

|               |                       |                |                       |                |
|---------------|-----------------------|----------------|-----------------------|----------------|
| <i>FBA1</i>   | 0.98                  | 2.12           | 0.35                  | 1.21           |
| <i>FBA2</i>   | 0.97                  | 3.10           | 0.44                  | 1.19           |
| <i>FBA3</i>   | 1.01                  | 2.18           | 0.56                  | 1.22           |
| <i>FBA6</i>   | 1.10                  | 3.15           | 0.52                  | 1.26           |
| <i>FBA7</i>   | 1.20                  | 2.21           | 0.49                  | 1.28           |
| <i>PGK1</i>   | 0.96                  | 4.35           | 0.45                  | 1.31           |
| <i>PGK2</i>   | 0.99                  | 3.15           | 0.61                  | 1.18           |
| <i>PGK3</i>   | 0.97                  | 5.32           | 0.62                  | 1.33           |
| <i>SBPase</i> | 0.98                  | 3.26           | 0.54                  | 1.34           |
| <i>RCA1</i>   | 1.02                  | 2.45           | 0.50                  | 1.52           |
| <i>RCA2</i>   | 1.12                  | 4.28           | 0.51                  | 1.33           |
| <i>RCA3</i>   | 0.97                  | 3.19           | 0.58                  | 1.21           |
| <i>FBP1</i>   | 0.98                  | 2.20           | 0.61                  | 1.23           |
| <i>FBP2</i>   | 1.01                  | 3.24           | 0.35                  | 1.25           |
| <i>FBP2</i>   | 1.10                  | 2.12           | 0.46                  | 1.09           |
|               | <u>H<sub>2</sub>O</u> | <u>Spd-CDs</u> | <u>H<sub>2</sub>O</u> | <u>Spd-CDs</u> |
|               | Control               |                | Heat                  |                |

**Figure S6.** Transcription of Calvin cycle genes in Spd-CDs pretreated plants under normal temperature (25 °C) or high temperature (45 °C) treatment. 6 h after the application, leaf samples were collected for gene expression analysis. *Actin* was used as the reference gene. The data are presented as mean values±SD; n=3. Three independent experiments were performed with similar results.

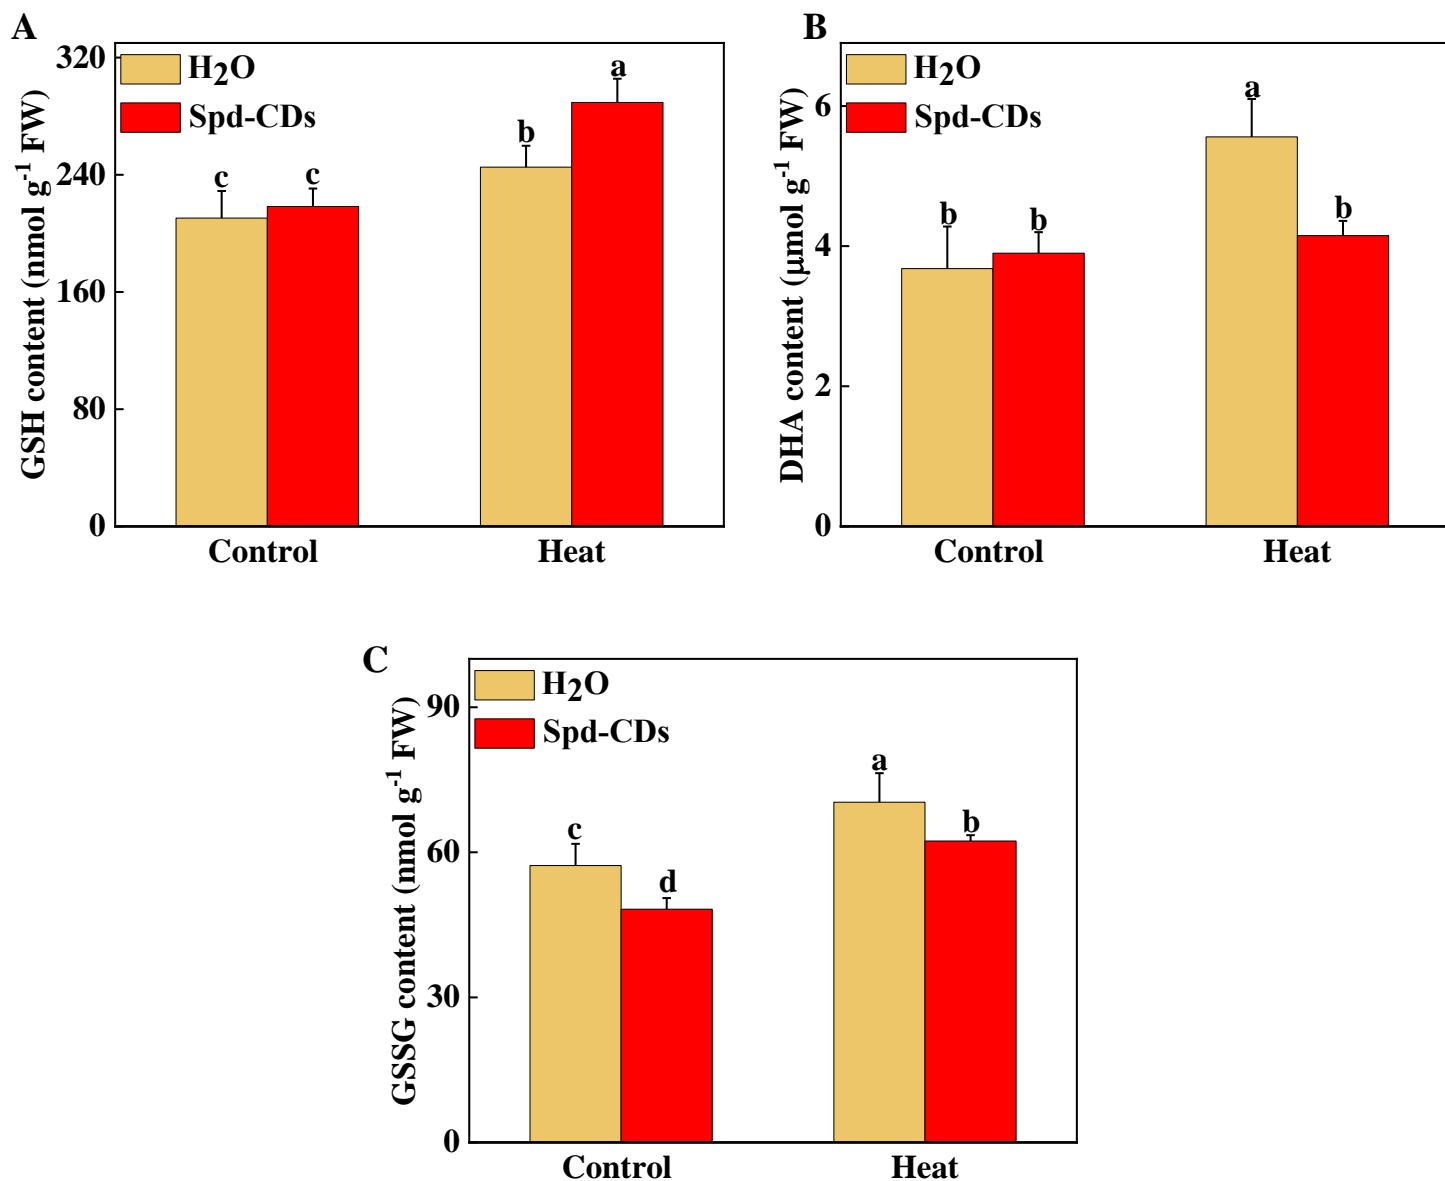

**Figure S7.** Antioxidants in Spd-CDs pretreated plants under normal temperature (25 °C) or high temperature (45 °C) treatment. The effects of Spd-CDs on antioxidants (GSH, glutathione; DHA, dehydroascorbate; GSSG, glutathione disulfide) in response to high temperature (A, B, C). The data are presented as mean values $\pm$ SD; n=3. Different letters indicate significant differences between treatments ( $P < 0.05$ , Duncan's multiple range test). Three independent experiments were performed with similar results.

|              |                       |                |                       |                |
|--------------|-----------------------|----------------|-----------------------|----------------|
| <i>RbohA</i> | 1.02                  | 1.12           | 3.60                  | 1.35           |
| <i>RbohB</i> | 0.98                  | 1.21           | 4.50                  | 1.45           |
| <i>RbohC</i> | 1.12                  | 1.10           | 5.10                  | 1.62           |
| <i>RbohD</i> | 0.99                  | 1.00           | 3.50                  | 1.35           |
| <i>DHAR</i>  | 1.12                  | 2.23           | 4.30                  | 5.68           |
| <i>MDHAR</i> | 1.15                  | 2.25           | 4.10                  | 6.25           |
| <i>APX</i>   | 1.19                  | 3.98           | 3.78                  | 6.37           |
| <i>CAT</i>   | 1.21                  | 2.13           | 3.35                  | 6.58           |
| <i>SOD</i>   | 1.01                  | 2.14           | 3.20                  | 6.89           |
| <i>GPX</i>   | 0.96                  | 3.15           | 2.58                  | 7.01           |
| <i>GR</i>    | 0.97                  | 3.17           | 2.78                  | 7.05           |
|              | <u>H<sub>2</sub>O</u> | <u>Spd-CDs</u> | <u>H<sub>2</sub>O</u> | <u>Spd-CDs</u> |
|              | Control               |                | Heat                  |                |

**Figure S8.** Transcription of ROS production and scavenging enzymatic activities genes in Spd-CDs pretreated plants under normal temperature (25 °C) or high temperature (45 °C) treatment. 6 h after the application, leaf samples were collected for gene expression analysis. *Actin* was used as the reference gene. The data are presented as mean values $\pm$ SD; n=3. Three independent experiments were performed with similar results.

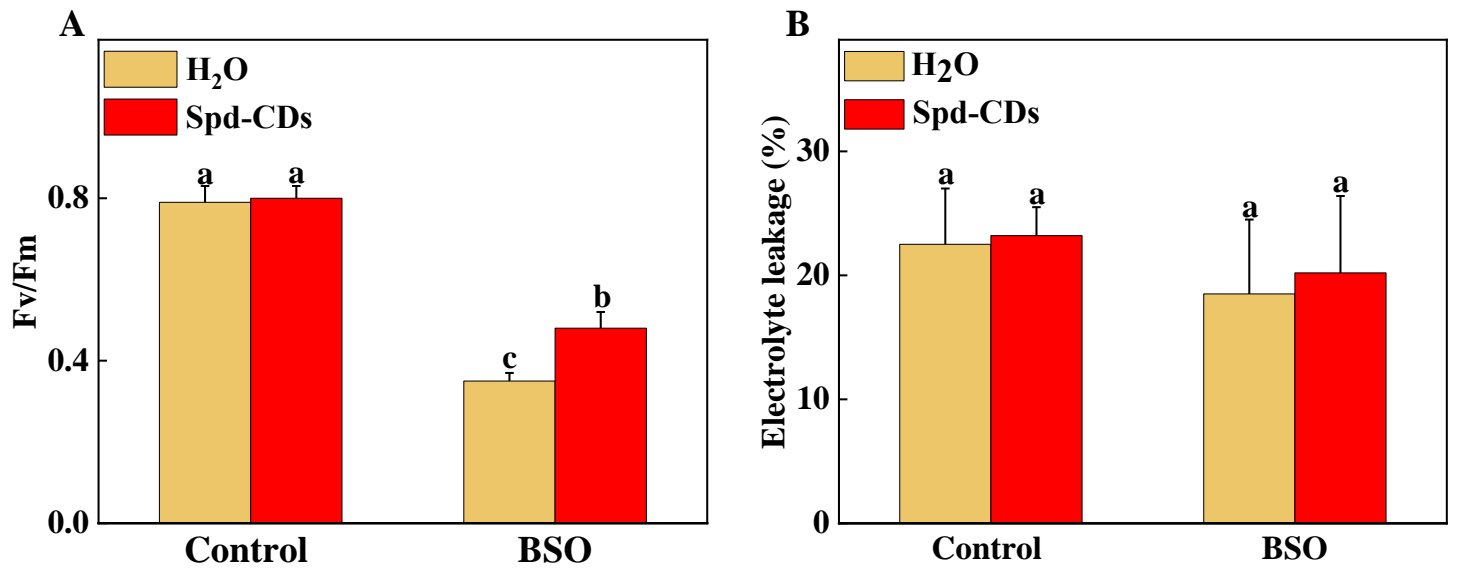

**Figure S9.** Effects of BSO on the maximum quantum yield of PSII (F<sub>v</sub>/F<sub>m</sub>) (**A**) and the relative electrolyte leakage (**B**) under normal conditions in Spd-CDs treated plants. The data are presented as mean values $\pm$ SD; n=3. Three independent experiments were performed with similar results. Different letters indicate significant differences between treatments ( $P<0.05$ , Duncan's multiple range test). Three independent experiments were performed with similar results.
